# Supplementary material
Source: publisher figshare collection journal article supplement (https://frontiersin.figshare.com/ndownloader/files/34494452)
Supplement: Supplementary file 1 [file 34494452]

Supplementary Material

Supplementary table 1. Description of each field with crop identity, year and geographic information: region, locality, latitude, longitude and altitude using World Geodetic System 1984 (WGS 84). “C” indicates control field (i.e. the main crop only) and “FAP” indicates Farming with Alternative Pollinators field (main crop in 75 % of the field surrounded by MHEP in the 25 % area)

| Crops | Field | Year | Region | Locality | Latitude | Longitude | Altitude |
| --- | --- | --- | --- | --- | --- | --- | --- |
| *Cucurbita maxima* | C1 | 2018 | Sefrou | Laanoussar | 33.6234169 | -4.90019703 | 1474 |
| *Cucurbita maxima* | C2 | 2018 | Sefrou | Laanoussar | 33.6234169 | -4.90019703 | 1474 |
| *Cucurbita maxima* | C3 | 2018 | Sefrou | Laanoussar | 33.6234169 | -4.90019703 | 1474 |
| *Cucurbita maxima* | FAP1 | 2018 | Sefrou | Laanoussar | 33.6234169 | -4.90019703 | 1474 |
| *Cucurbita maxima* | FAP2 | 2018 | Sefrou | Laanoussar | 33.6234169 | -4.90019703 | 1474 |
| *Cucurbita maxima* | FAP3 | 2018 | Sefrou | Laanoussar | 33.6234169 | -4.90019703 | 1474 |
| *Cucurbita maxima* | FAP4 | 2018 | Sefrou | Laanoussar | 33.6234169 | -4.90019703 | 1474 |
| *Cucurbita maxima* | FAP5 | 2018 | Sefrou | Laanoussar | 33.6234169 | -4.90019703 | 1474 |
| *Cucurbita maxima* | C1 | 2018 | Settat | Mzamza Janoubia | 32.93170166 | -7.49230003 | 546 |
| *Cucurbita maxima* | C2 | 2018 | Settat | Mzamza Janoubia | 32.97470093 | -7.5158 | 450 |
| *Cucurbita maxima* | FAP1 | 2018 | Settat | Mzamza Janoubia | 32.94879913 | -7.49510002 | 525 |
| *Cucurbita maxima* | FAP2 | 2018 | Settat | Mzamza Janoubia | 32.95240021 | -7.51420021 | 509 |
| *Cucurbita maxima* | FAP3 | 2018 | Settat | Mzamza Janoubia | 32.97198868 | -7.49296856 | 475 |
| *Cucurbita maxima* | FAP4 | 2018 | Settat | Mzamza Janoubia | 32.95640182 | -7.53060007 | 534 |
| *Cucurbita maxima* | FAP5 | 2018 | Settat | Mzamza Janoubia | 32.96962357 | -7.51781845 | 457 |
| *Vicia faba* | C1 | 2018 | Kenitra | Haddada | 34.12107849 | -6.56302357 | 97 |
| *Vicia faba* | C2 | 2018 | Kenitra | Haddada | 34.14984894 | -6.54176664 | 132 |
| *Vicia faba* | C3 | 2018 | Kenitra | Haddada | 34.11984634 | -6.57578945 | 110 |
| *Vicia faba* | FAP1 | 2018 | Kenitra | Haddada | 34.12513351 | -6.57340288 | 112 |
| *Vicia faba* | FAP2 | 2018 | Kenitra | Haddada | 34.12843704 | -6.55921745 | 125 |
| *Vicia faba* | FAP3 | 2018 | Kenitra | Haddada | 34.11808395 | -6.55127525 | 105 |
| *Vicia faba* | FAP4 | 2018 | Kenitra | Haddada | 34.14526749 | -6.54862785 | 122 |
| *Vicia faba* | FAP5 | 2018 | Kenitra | Haddada | 34.13537598 | -6.54006386 | 67 |
| *Vicia faba* | C1 | 2018 | Sefrou | Laanoussar | 33.6256218 | -4.89916658 | 1515 |
| *Vicia faba* | C2 | 2018 | Sefrou | Laanoussar | 33.6203804 | -4.88003969 | 1502 |
| *Vicia faba* | C3 | 2018 | Sefrou | Laanoussar | 33.62033463 | -4.87956333 | 1418 |
| *Vicia faba* | FAP1 | 2018 | Sefrou | Laanoussar | 33.6256218 | -4.89916658 | 1461 |
| *Vicia faba* | FAP2 | 2018 | Sefrou | Laanoussar | 33.7098732 | -4.84313679 | 1285 |
| *Vicia faba* | FAP4 | 2018 | Sefrou | Sidi Youssef Ben Ahmed | 33.82535172 | -4.78015709 | 753 |
| *Vicia faba* | FAP5 | 2018 | Sefrou | Sidi Youssef Ben Ahmed | 33.81951904 | -4.76402617 | 821 |
| *Vicia faba* | C1 | 2018 | Settat | Oueled Sghir | 32.82870102 | -7.63980007 | 490 |
| *Vicia faba* | C2 | 2018 | Settat | Oueled Sghir | 32.82301712 | -7.64213324 | 463 |
| *Vicia faba* | C3 | 2018 | Settat | Oueled Sghir | 32.82592392 | -7.63709307 | 472 |
| *Vicia faba* | FAP1 | 2018 | Settat | Oueled Sghir | 32.83789825 | -7.62160015 | 507 |
| *Vicia faba* | FAP2 | 2018 | Settat | Oueled Sghir | 32.82302856 | -7.62245321 | 493 |
| *Vicia faba* | FAP3 | 2018 | Settat | Oueled Sghir | 32.84564209 | -7.63749266 | 484 |
| *Vicia faba* | FAP4 | 2018 | Settat | Oueled Sghir | 32.80488968 | -7.62752628 | 476 |
| *Cucurbita maxima* | C1 | 2019 | Errachidia | Sidi Boukil | 32.24020004 | -4.72840023 | 1443 |
| *Cucurbita maxima* | C2 | 2019 | Errachidia | Sidi Boukil | 32.22359848 | -4.68529987 | 1419 |
| *Cucurbita maxima* | C3 | 2019 | Errachidia | Ait Said | 32.23830032 | -4.6624999 | 1406 |
| *Cucurbita maxima* | FAP1 | 2019 | Errachidia | Mzizl | 32.22340012 | -4.69210005 | 1419 |
| *Cucurbita maxima* | FAP2 | 2019 | Errachidia | Sidi Boukil | 32.2276001 | -4.69649982 | 1421 |
| *Cucurbita maxima* | FAP3 | 2019 | Errachidia | Ait Said | 32.22520065 | -4.69770002 | 1423 |
| *Cucurbita maxima* | FAP4 | 2019 | Errachidia | Sidi Boukil | 32.23649979 | -4.7112999 | 1432 |
| *Cucurbita maxima* | FAP5 | 2019 | Errachidia | Sidi Boukil | 32.22769928 | -4.71430016 | 1439 |
| *Cucurbita maxima* | C1 | 2019 | Kenitra | Haddada | 34.13970184 | -6.53520012 | 65 |
| *Cucurbita maxima* | C2 | 2019 | Kenitra | Bouknadel | 34.09140015 | -6.59030008 | 107 |
| *Cucurbita maxima* | C3 | 2019 | Kenitra | Haddada | 34.10829926 | -6.55950022 | 119 |
| *Cucurbita maxima* | FAP1 | 2019 | Kenitra | Haddada | 34.1208992 | -6.56279993 | 100 |
| *Cucurbita maxima* | FAP2 | 2019 | Kenitra | Haddada | 34.12829971 | -6.55919981 | 125 |
| *Cucurbita maxima* | FAP3 | 2019 | Kenitra | Haddada | 34.11980057 | -6.57579994 | 110 |
| *Cucurbita maxima* | FAP4 | 2019 | Kenitra | Haddada | 34.06169891 | -6.62470007 | 121 |
| *Cucurbita maxima* | FAP5 | 2019 | Kenitra | Bouknadel | 34.06520081 | -6.61299992 | 115 |
| *Cucurbita maxima* | C1 | 2019 | Sefrou | Sidi Ahmed Ben youssef | 33.83380127 | -4.75110006 | 772 |
| *Cucurbita maxima* | C2 | 2019 | Sefrou | Sidi Ahmed Ben youssef | 33.81669998 | -4.76280022 | 824 |
| *Cucurbita maxima* | C3 | 2019 | Sefrou | Sidi Ahmed Ben youssef | 33.83580017 | -4.74690008 | 770 |
| *Cucurbita maxima* | FAP1 | 2019 | Sefrou | Aghbalou Aqorar | 33.85979843 | -4.65929985 | 561 |
| *Cucurbita maxima* | FAP2 | 2019 | Sefrou | Aghbalou Aqorar | 33.8885994 | -4.63940001 | 592 |
| *Cucurbita maxima* | FAP3 | 2019 | Sefrou | Aghbalou Aqorar | 33.8995018 | -4.64120007 | 587 |
| *Cucurbita maxima* | FAP4 | 2019 | Sefrou | Sidi Ahmed Ben youssef | 33.81570053 | -4.77250004 | 831 |
| *Cucurbita maxima* | FAP5 | 2019 | Sefrou | Sidi Ahmed Ben youssef | 33.80780029 | -4.76230001 | 826 |
| *Cucurbita maxima* | C1 | 2019 | Settat | Oueled Sghir | 32.82870102 | -7.63980007 | 490 |
| *Cucurbita maxima* | C2 | 2019 | Settat | Oueled Sghir | 32.82239914 | -7.66919994 | 458 |
| *Cucurbita maxima* | C3 | 2019 | Settat | Oueled Sghir | 32.8291861 | -7.6512451 | 469 |
| *Cucurbita maxima* | FAP1 | 2019 | Settat | Oueled Sghir | 32.83789825 | -7.62160015 | 507 |
| *Cucurbita maxima* | FAP2 | 2019 | Settat | Oueled Sghir | 32.82889938 | -7.65129995 | 481 |
| *Cucurbita maxima* | FAP3 | 2019 | Settat | Oueled Sghir | 32.83160019 | -7.62939978 | 440 |
| *Cucurbita maxima* | FAP4 | 2019 | Settat | Oueled Sghir | 32.82279968 | -7.6420002 | 459 |
| *Cucurbita maxima* | FAP5 | 2019 | Settat | Oueled Sghir | 32.82590103 | -7.63679981 | 473 |
| *Vicia faba* | C1 | 2019 | Errachidia | Sidi Boukil | 32.23490143 | -4.67420006 | 1410 |
| *Vicia faba* | C2 | 2019 | Errachidia | Sidi Boukil | 32.23649979 | -4.6711998 | 1409 |
| *Vicia faba* | C3 | 2019 | Errachidia | Tabia | 32.22980118 | -4.67789984 | 1413 |
| *Vicia faba* | FAP1 | 2019 | Errachidia | Mzizl | 32.22119904 | -4.75299978 | 1479 |
| *Vicia faba* | FAP2 | 2019 | Errachidia | Sidi Boukil | 32.23109818 | -4.71010017 | 1433 |
| *Vicia faba* | FAP3 | 2019 | Errachidia | Ait Said | 32.24280167 | -4.66160011 | 1408 |
| *Vicia faba* | FAP4 | 2019 | Errachidia | Sidi Boukil | 32.22510147 | -4.69460011 | 1422 |
| *Vicia faba* | FAP5 | 2019 | Errachidia | Sidi Boukil | 32.22539902 | -4.704 | 1429 |
| *Vicia faba* | C1 | 2019 | Kenitra | Haddada | 34.1208992 | -6.56279993 | 100 |
| *Vicia faba* | C2 | 2019 | Kenitra | Haddada | 34.09140015 | -6.59030008 | 107 |
| *Vicia faba* | C3 | 2019 | Kenitra | Haddada | 34.10829926 | -6.55940008 | 119 |
| *Vicia faba* | FAP1 | 2019 | Kenitra | Haddada | 34.13970184 | -6.53520012 | 65 |
| *Vicia faba* | FAP2 | 2019 | Kenitra | Haddada | 34.12829971 | -6.55919981 | 125 |
| *Vicia faba* | FAP3 | 2019 | Kenitra | Haddada | 34.11980057 | -6.57579994 | 110 |
| *Vicia faba* | FAP4 | 2019 | Kenitra | Bouknadel | 34.06169891 | -6.62470007 | 121 |
| *Vicia faba* | FAP5 | 2019 | Kenitra | Haddada | 34.06520081 | -6.61307001 | 115 |
| *Vicia faba* | C1 | 2019 | Sefrou | Sidi Ahmed Ben youssef | 33.83420181 | -4.74700022 | 770 |
| *Vicia faba* | C2 | 2019 | Sefrou | Sidi Ahmed Ben youssef | 33.83409882 | -4.75099993 | 772 |
| *Vicia faba* | C3 | 2019 | Sefrou | Sidi Ahmed Ben youssef | 33.82030106 | -4.76399994 | 808 |
| *Vicia faba* | FAP1 | 2019 | Sefrou | Sidi Ahmed Ben youssef | 33.80649948 | -4.76819992 | 864 |
| *Vicia faba* | FAP2 | 2019 | Sefrou | Aghbalou Aqorar | 33.90209961 | -4.64750004 | 579 |
| *Vicia faba* | FAP3 | 2019 | Sefrou | Aghbalou Aqorar | 33.86439896 | -4.67140007 | 626 |
| *Vicia faba* | FAP4 | 2019 | Sefrou | Azzaba | 33.85580063 | -4.70669985 | 706 |
| *Vicia faba* | FAP5 | 2019 | Sefrou | Sidi Ahmed Ben youssef | 33.82080078 | -4.76109982 | 805 |
| *Vicia faba* | C1 | 2019 | Settat | Oueled Sghir | 32.82870102 | -7.63980007 | 490 |
| *Vicia faba* | C2 | 2019 | Settat | Oueled Sghir | 32.82590103 | -7.63679981 | 473 |
| *Vicia faba* | C3 | 2019 | Settat | Oueled Sghir | 32.82260132 | -7.62209988 | 495 |
| *Vicia faba* | FAP1 | 2019 | Settat | Oueled Sghir | 32.83789825 | -7.62160015 | 507 |
| *Vicia faba* | FAP2 | 2019 | Settat | Oueled Sghir | 32.82239914 | -7.66919994 | 458 |
| *Vicia faba* | FAP3 | 2019 | Settat | Oueled Sghir | 32.83160019 | -7.62939978 | 440 |
| *Vicia faba* | FAP4 | 2019 | Settat | Oueled Sghir | 32.82279968 | -7.6420002 | 459 |
| *Vicia faba* | FAP5 | 2019 | Settat | Oueled Sghir | 32.82889938 | -7.65129995 | 481 |

| Supplementary Figure 1. Experimental designs of FAP fields (main crop in 75% of the field surrounded by marketable habitat enhancement plants) for each crop in Settat in 2018 and 2019 |
| --- |
| 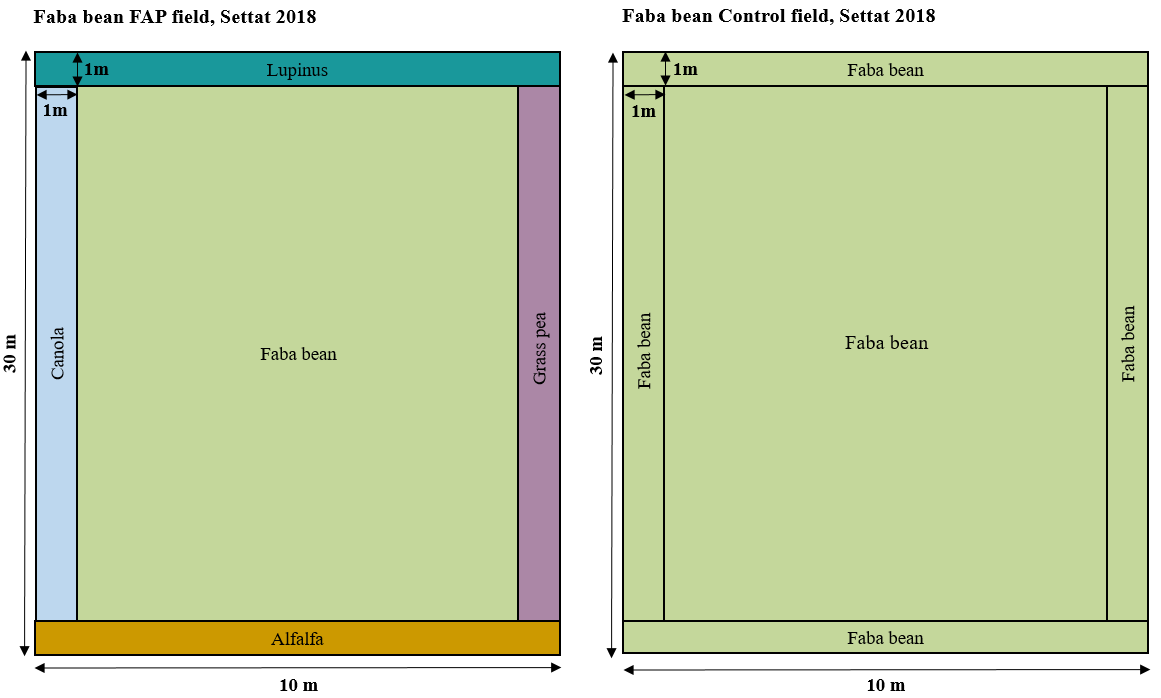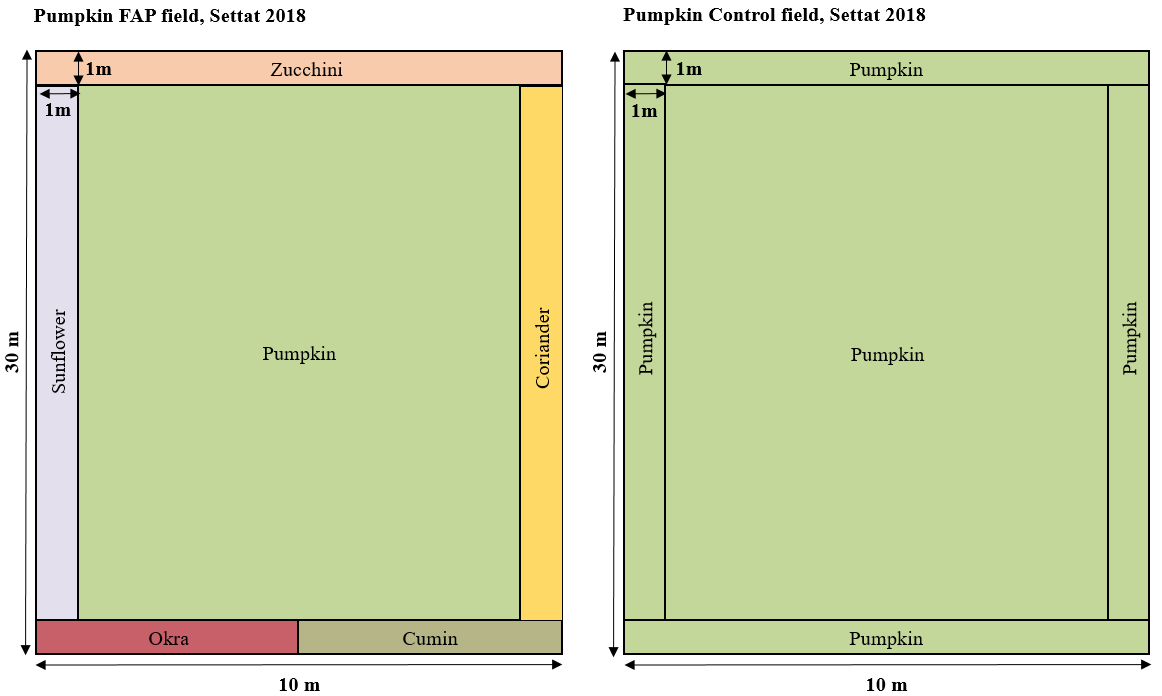 |
| 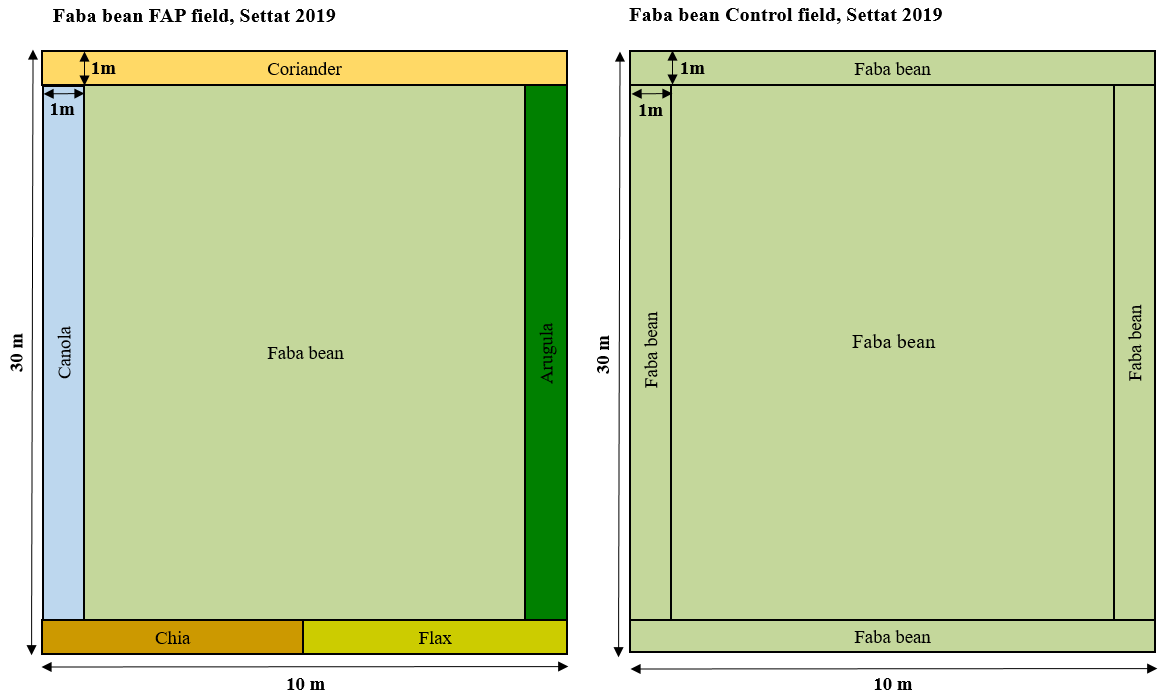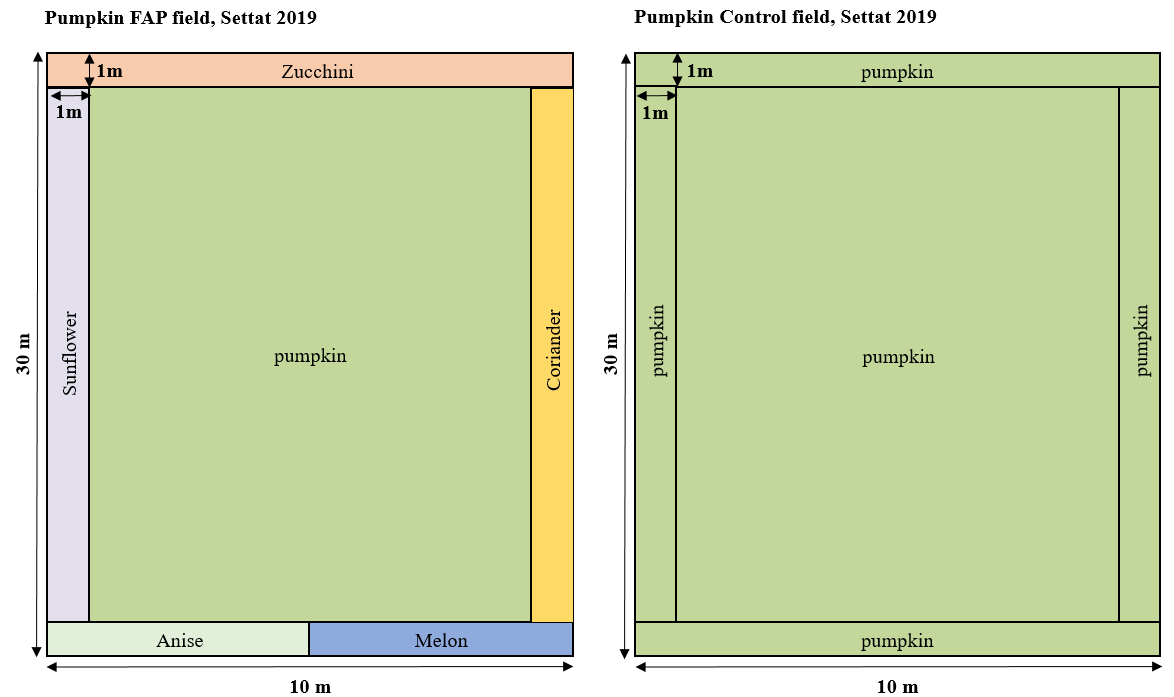 |
| Supplementary Figure 2. Experimental designs of FAP fields (main crop in 75% of the field surrounded by marketable habitat enhancement plants) for each crop in Kenitra in 2018 and 2019 |
| 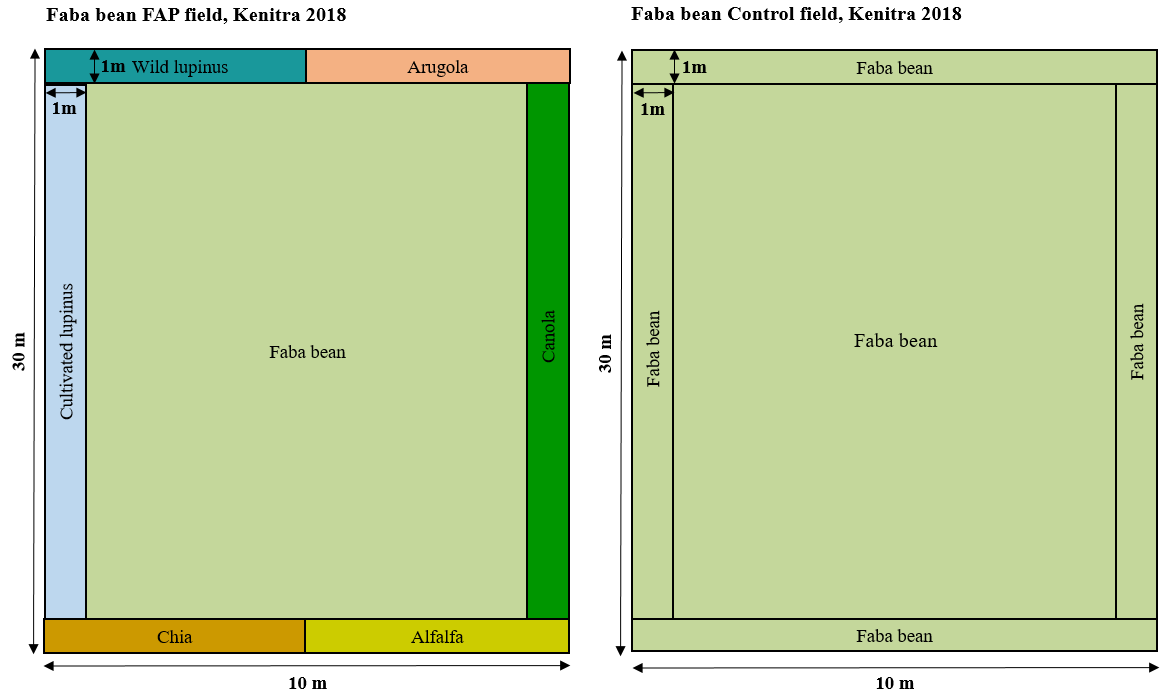 |
|  |
| 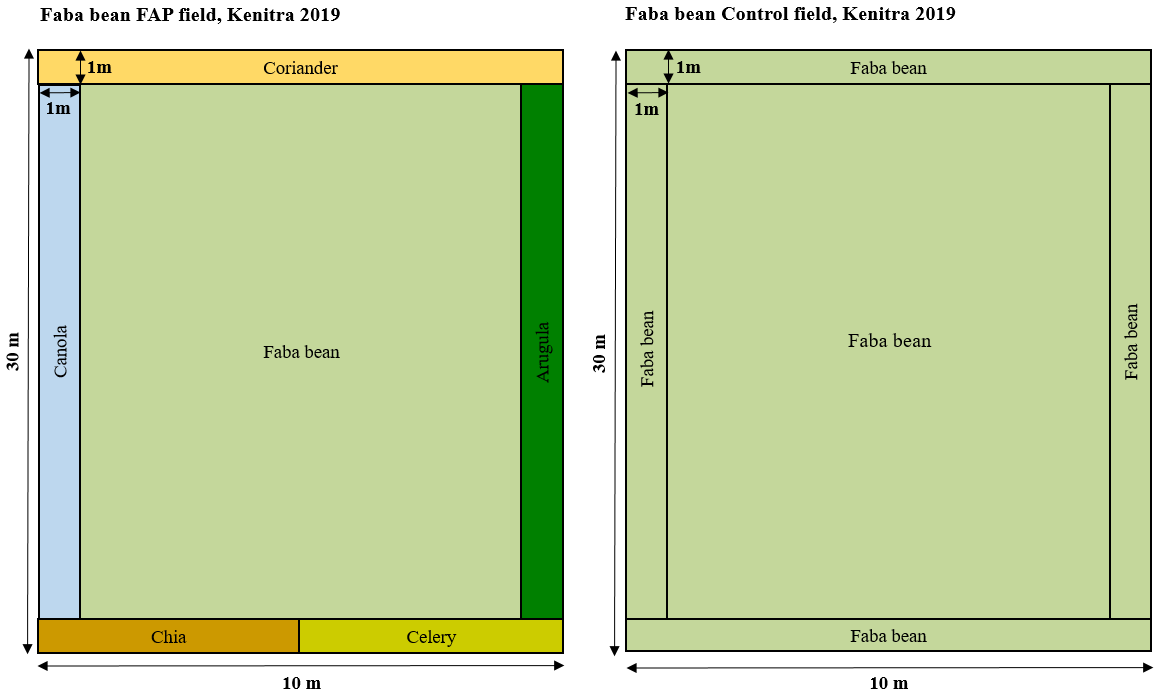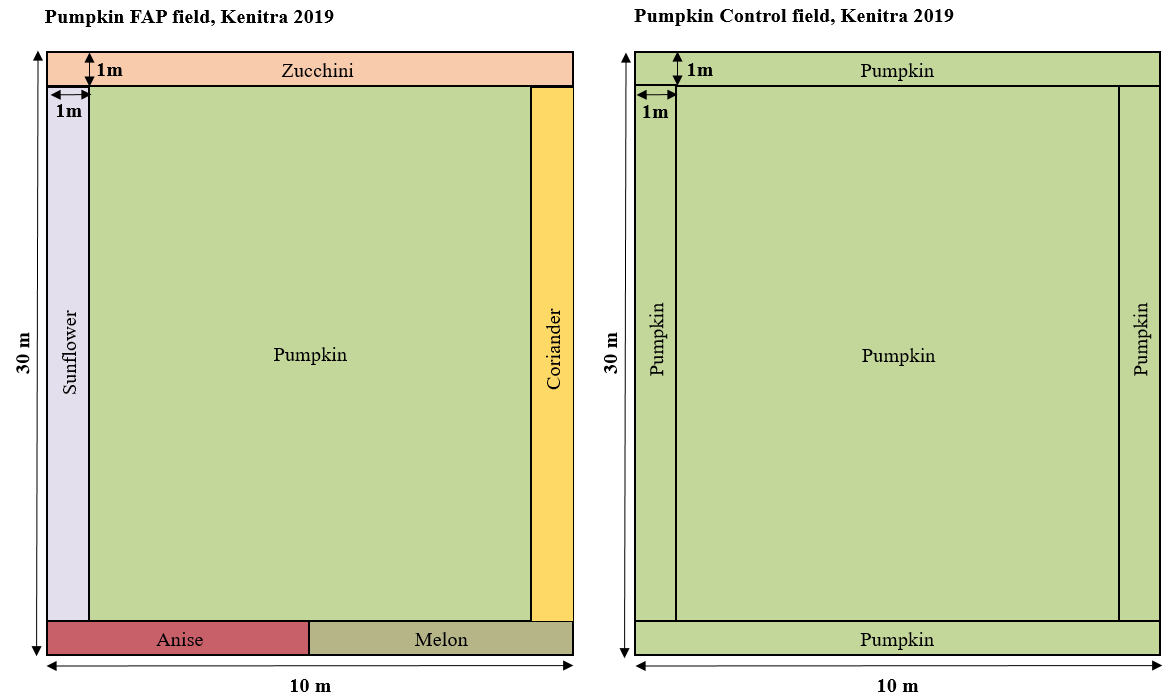 |
|  |
| Supplementary Figure 3. Experimental designs of FAP fields (main crop in 75% of the field surrounded by marketable habitat enhancement plants) for each crop in Sefrou in 2018 and 2019 | |
| 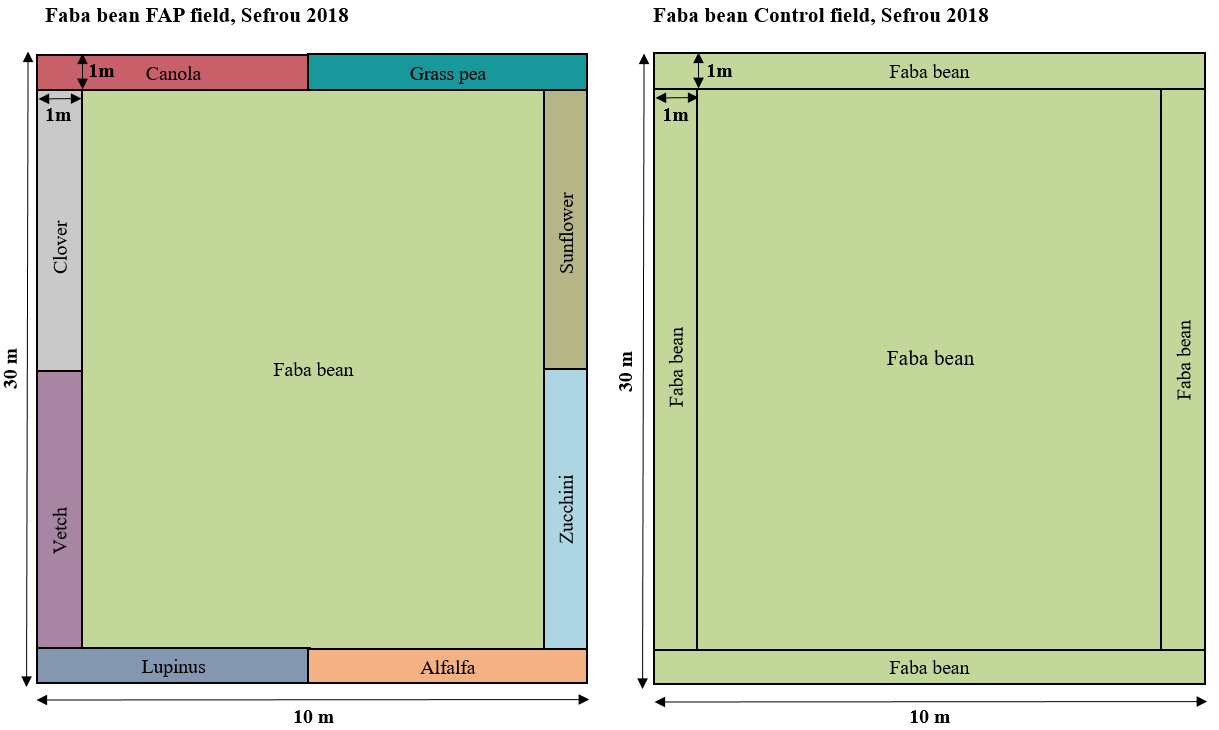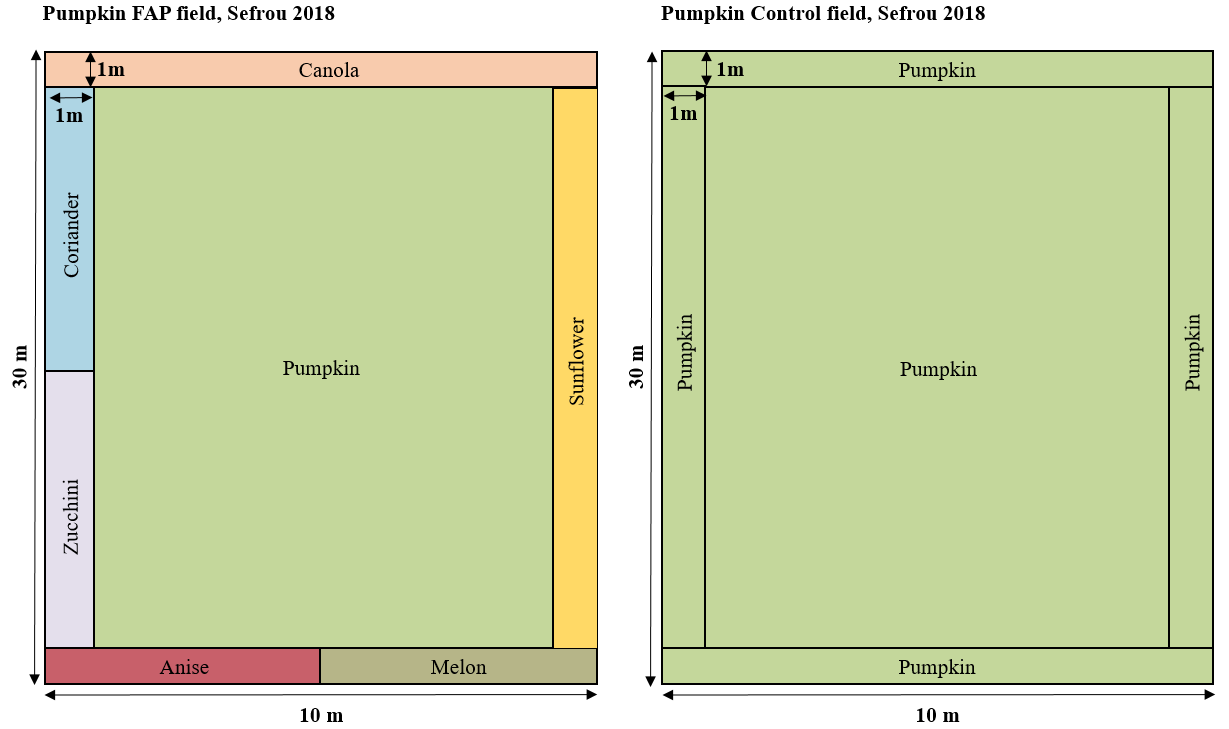 | |
| 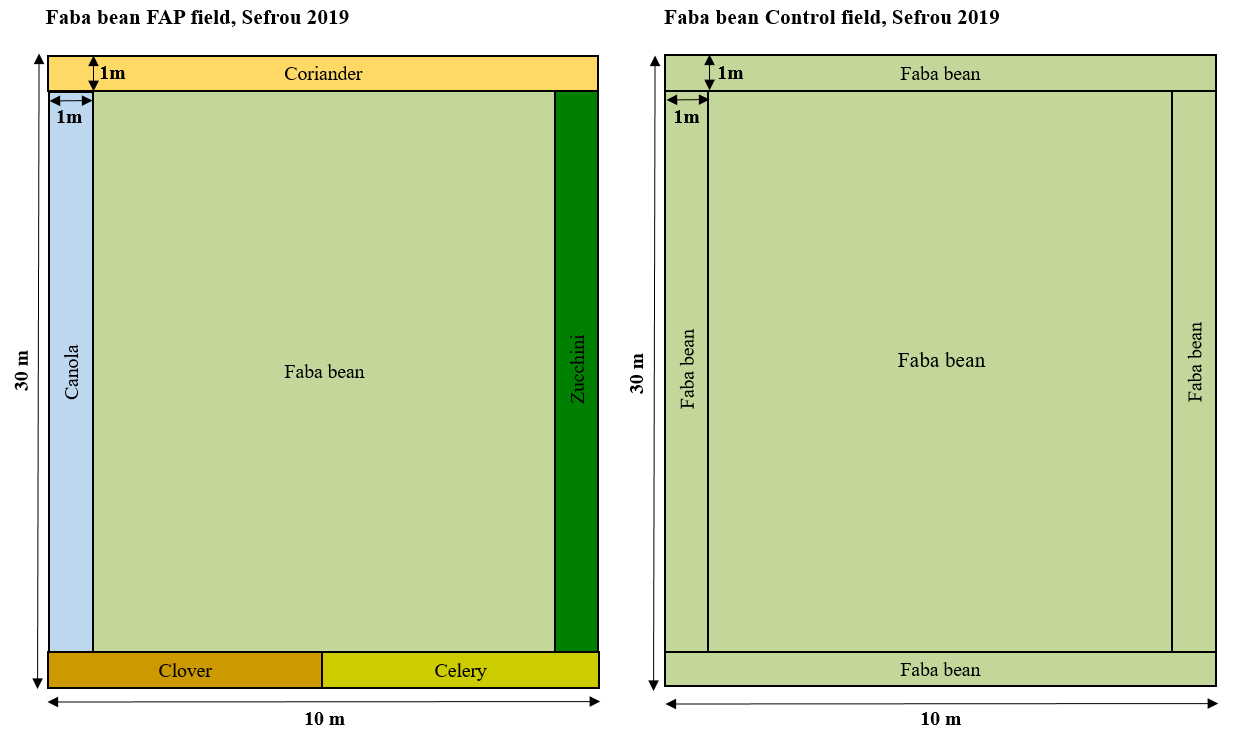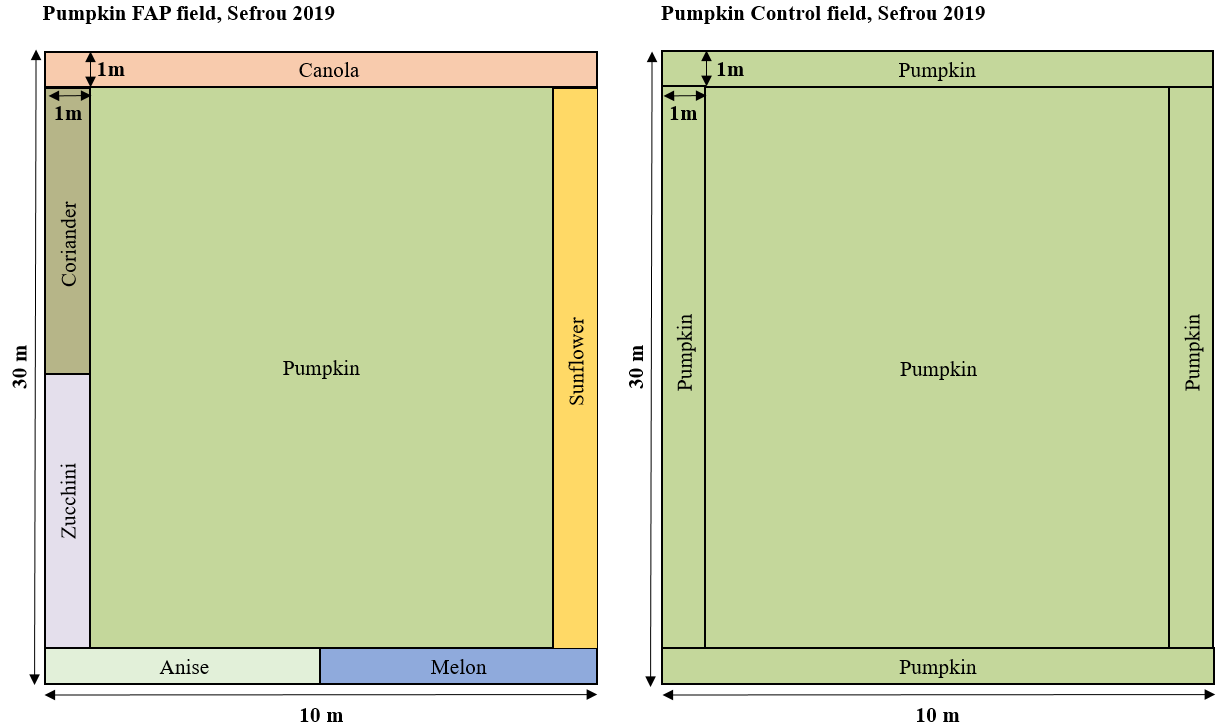 | |

| Supplementary Figure 4. Experimental designs of FAP fields (main crop in 75% of the field surrounded by marketable habitat enhancement plants) for each crop in Errachidia in 2019 |
| --- |
| 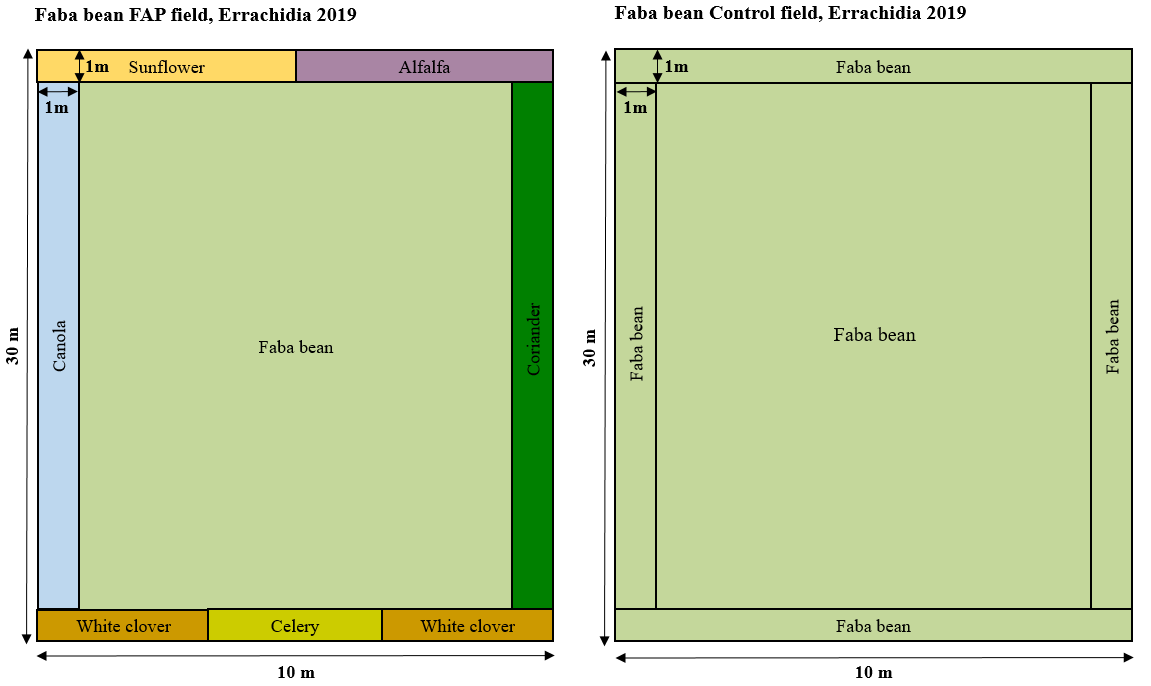 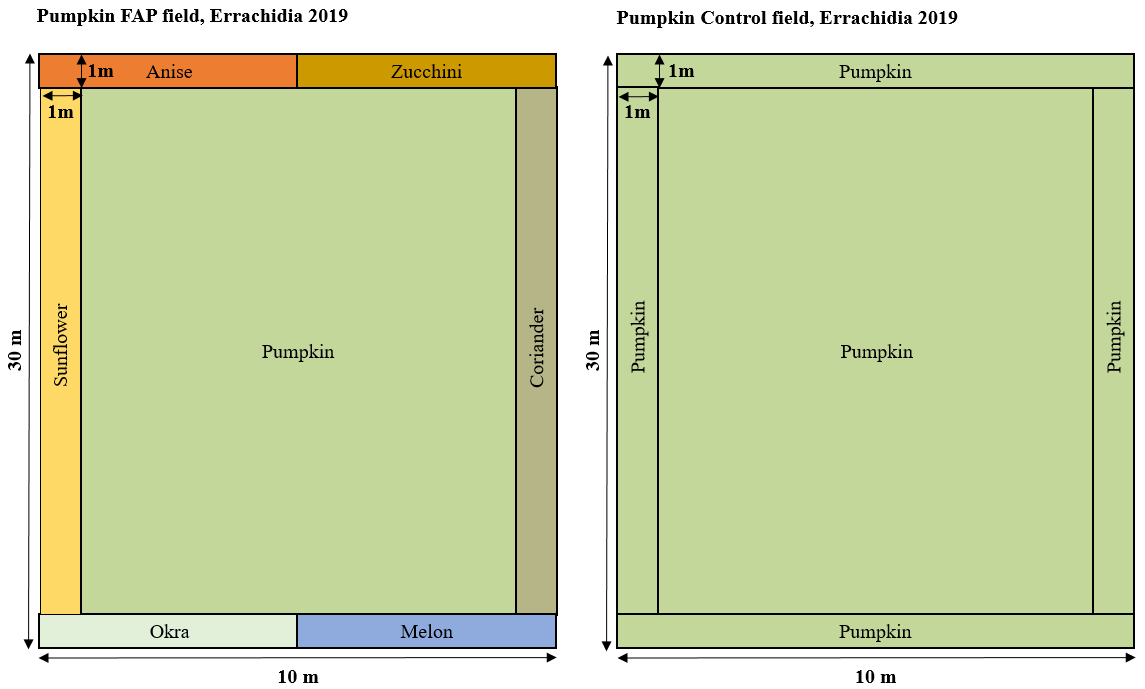 |
